# Supplementary material
Source: PubMed Central journal article supplement (PMC5173397)
Supplement: NIHMS827884-supplement-1.pdf [file NIHMS827884-supplement-1.pdf]

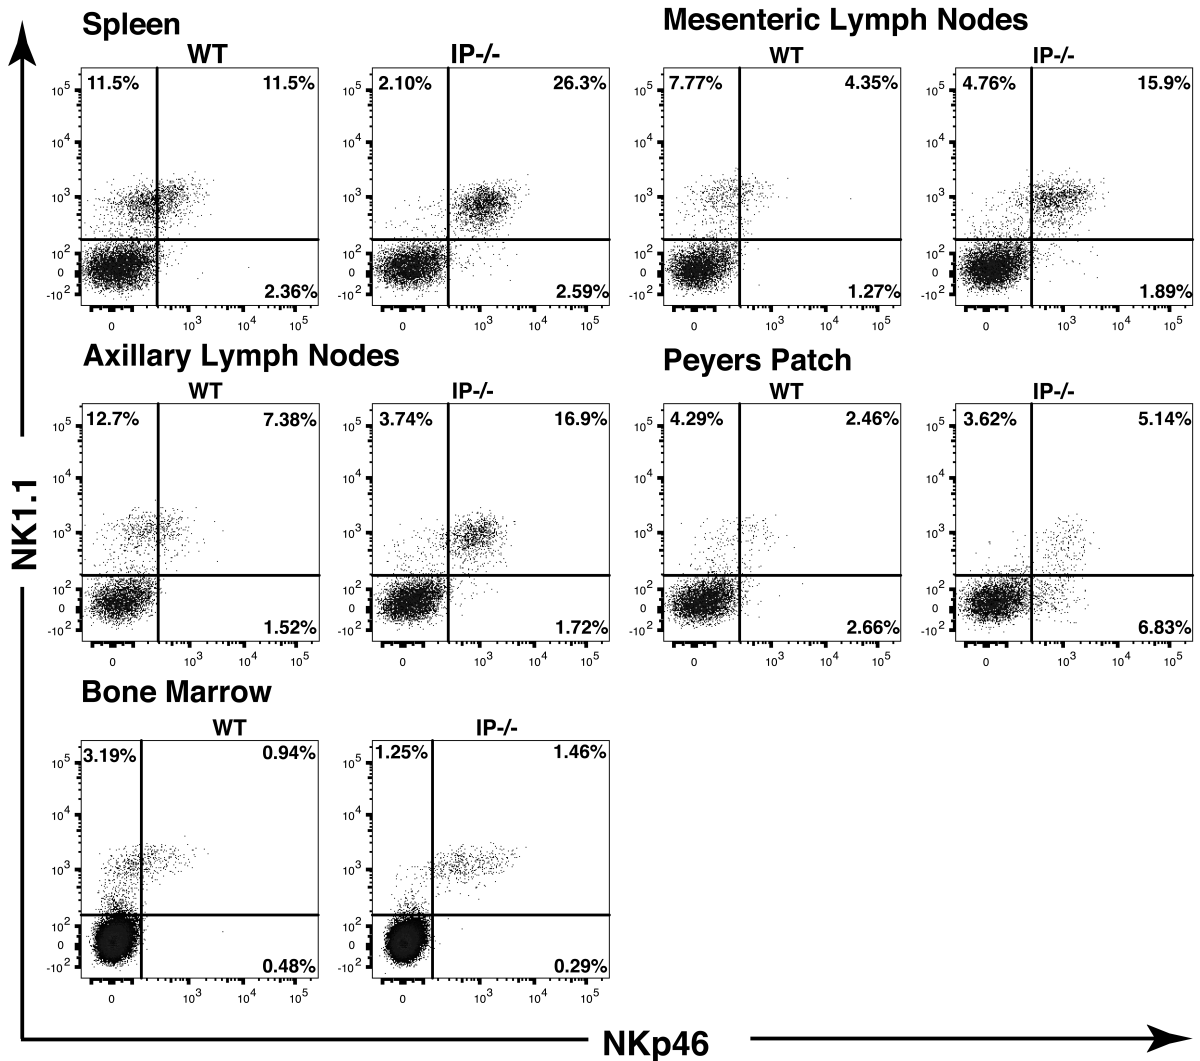

**Figure S1.** NKp46 expression is elevated in all lymphoid tissues in naïve IP<sup>-/-</sup> mice. The number of CD3<sup>-</sup>CD19<sup>-</sup>NK1.1<sup>+</sup> NK cells and expression levels of NKp46 present in the bone marrow, axillary lymph nodes, mesenteric lymph nodes, Peyers Patch and spleens (from 4 mice) was determined by 4-color flow cytometry. Data are representative of 2 independent experiments.

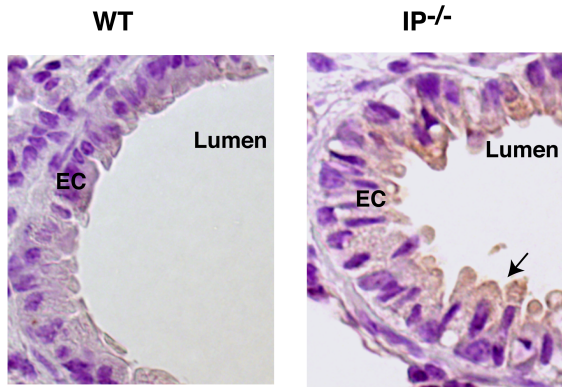

**Figure S2.** CX<sub>3</sub>CL1 expression in the lungs of IP<sup>-/-</sup> mice is predominantly by airway epithelial cells. Expression of CX<sub>3</sub>CL1 by lung tissue sections from IP<sup>-/-</sup> and WT mice (4 per group) was examined by immunohistochemical staining using anti-CX<sub>3</sub>CL1 Ab (5 µg/ml) and visualized by light microscopy (x40). Data are representative of 2 independent experiments.

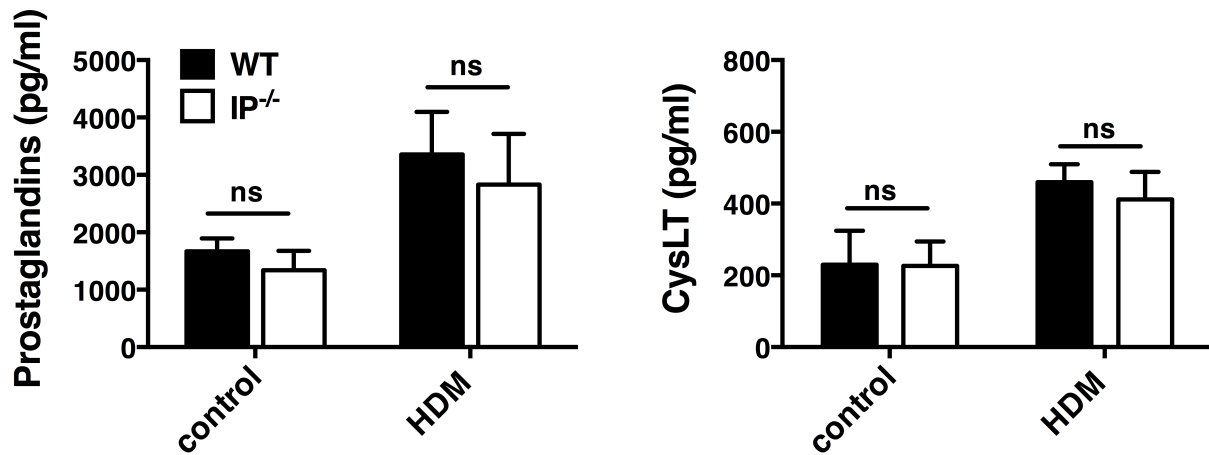

**Figure S3.** The levels of endogenous eicosanoid biosynthesis in IP<sup>-/-</sup> and WT mice. WT or IP<sup>-/-</sup> mice (6 per group) were subjected to acute allergen sensitization and challenge by repeated intranasal administration of HDM allergen or PBS (control). Prostaglandin and cysteinyl leukotriene (cysLT) levels in the BALF were determined using ELISA. Results are mean  $\pm$  SEM of 3 independent experiments, ns = not significant.

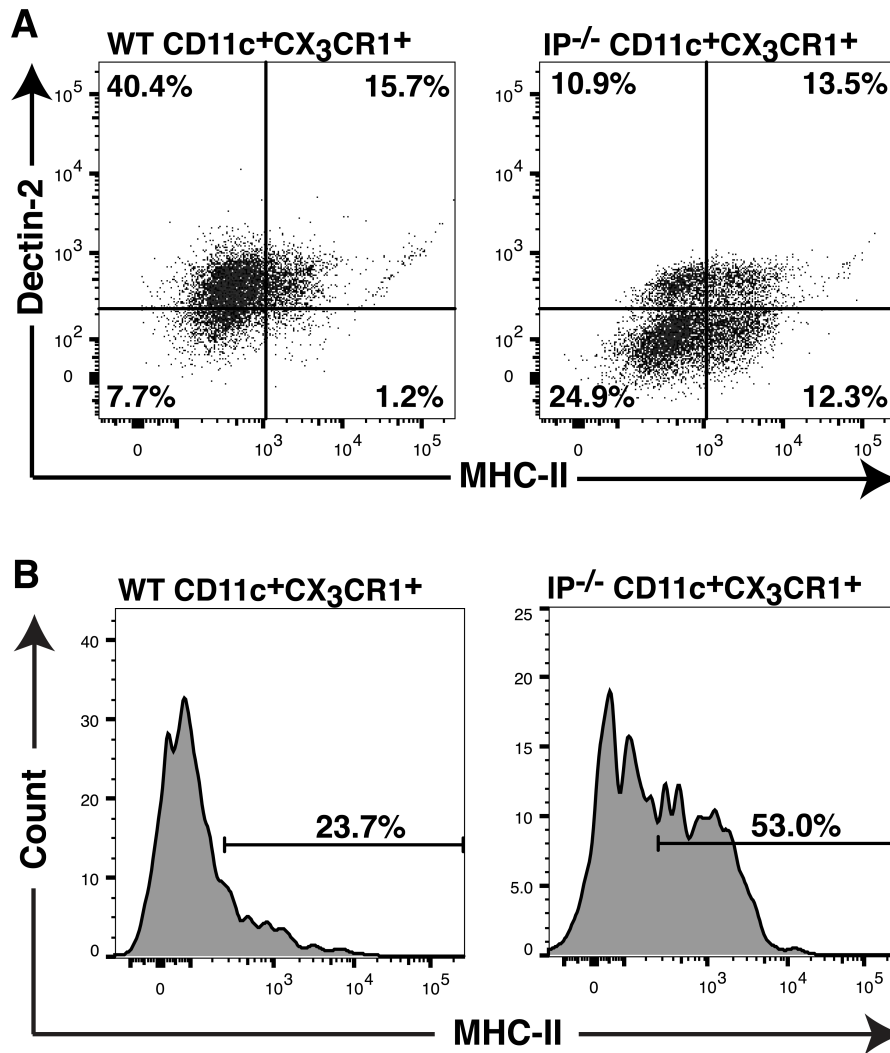

**Figure S4.** CD11c<sup>+</sup>CX<sub>3</sub>CR1<sup>+</sup> alveolar macrophages in the lungs of IP<sup>-/-</sup> mice have reduced levels of Dectin-2 expression. Myeloid cells present in the BALF and LMC of naïve WT or IP<sup>-/-</sup> mice (4 per group) were examined by 4-color flow cytometry. (A) After gating on CD11c<sup>+</sup>CX<sub>3</sub>CR1<sup>+</sup> cells, the expression of MHC-II and Dectin-2 by myeloid cells present in the BALF was determined. (B) Similarly, the number and expression of MHC-II by CD11c<sup>+</sup>CX<sub>3</sub>CR1<sup>+</sup> cells in the LMC was assessed. Results are representative of 3 independent experiments
